## ANESTHESIA. XII. STUDIES WITH ISOPROPENYL VINYL ETHER (PROPETHYLENE ETHER) IN MAN \*

E. HOLLISTER DAVIS, M.D., AND JOHN C. KRANTZ, JR., PH.D.

*Baltimore, Md.*

It occurred to one of the authors that it would be of interest from chemotherapeutic standpoint to prepare a hybrid molecule between ether and cyclopropane. Pursuant to this concept the anesthetic agents cyprome (1) and cypreth (2) ethers, were synthesized and studied. Later cyprethylene ether (3), containing the essential chemical linkage of cyclopropane, ethyl ether and ethylene, was prepared and studied in animals and man. Although cyprethylene ether appeared to be an excellent anesthetic agent in animals and proved meritorious in producing anesthesia in a limited number of cases in man, difficulties encountered in the synthesis of the compound, at present at least, preclude the possibility of its extensive use. Continuing our studies of similar ethers as anesthetic agents, our attention was directed to an isomer of cyprethylene ether, namely isopropenyl vinyl ether. The relationship chemically among these compounds is apparent from the following formulas

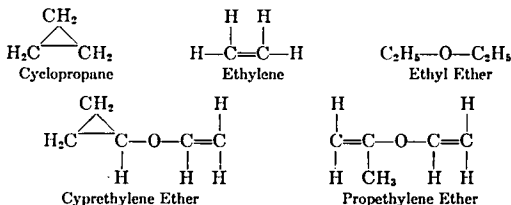

## PHYSICAL PROPERTIES

Propethylene ether (4) is a colorless, mobile liquid, possessing characteristic odor, slightly resembling cyclopropane. The specific gravity of propethylene ether is 0.786 at 20 C.; the boiling point is 55 C. The compound contains less than 0.1 per cent of acetone as an impurity. It is stable in alkaline and neutral media, but rapidly hydrolyzed into acetone and acetic aldehyde by strongly dissociating acids. Propethylene ether dissolves in water to the extent of 0.4 cc. per 100 cc. of water at 25 C., while 8.6 cc. of ethyl ether dissolves in the same volume of water under the same conditions. The vapor pressure at 25 C. is 256 mm. that of ethyl ether, at the same temperature, is 532 mm. (5).

\* From the Department of Pharmacology, School of Medicine, University of Maryland and the University and Union Memorial Hospitals of Baltimore, Md.

The inflammability range of propethylene ether is of the same order of magnitude as that of ethyl ether, namely, between 2 and 3 per cent.

In this group the longest administration of propethylene ether was one hundred twenty-five minutes.

### ANESTHETIC TECHNICS

Propethylene ether was administered by a variety of methods, e.g., open drop; open drop with oxygen under the mask; closed circuit with oxygen; closed circuit with nitrous oxide and oxygen; cyclopropane and oxygen and pentothal sodium. The agent was administered with and without preoperative medication. The potency of propethylene ether as measured in laboratory animals is far greater than that of ethyl ether. This appears to hold true for man and is manifested by a shorter period of induction and a lesser amount of the agent required for given anesthesia. The higher boiling point of propethylene ether reduces the amount of the anesthetic agent disseminated through the surrounding air during the induction period, when the open drop method is employed. A large evaporating surface on the mask was found advantageous to facilitate rapid volatilization. A tight fitting mask was found especially beneficial. Breath-holding and laryngeal spasm occurred very infrequently.

### RELAXATION DURING SURGICAL ANESTHESIA

In the foregoing anesthetics, relaxation of the abdominal musculature was comparable to that obtained during the same plane of ethyl ether anesthesia. In 2 negroes with a history of alcoholism, suitable relaxation was obtained only with some difficulty.

### BLOOD PRESSURE, PULSE AND RESPIRATION DURING SURGICAL ANESTHESIA

The data assembled on 34 cases of surgical anesthesia with propylene ether show that the blood pressure remains significantly unaffected during the anesthesia. The pulse is not usually affected in rate or volume. The respiration is deep and regular under the anesthetic agent, and like ethyl ether, propethylene ether appears to be a mild reflex respiratory stimulant during the induction period.

### POSTOPERATIVE SEQUELAE

In a series of 34 cases it is impossible to draw any significant comparative conclusions with regard to postoperative sequelae. Many of the patients had no symptoms whatsoever. The recovery period approaches that of cyclopropane anesthesia in its rapidity. Vomiting occurred in about one-third of the cases. Many of the patients were given premedication with morphine which many times vitiates any significance that may be attached to postoperative nausea.

Tests of renal and hepatic function were not performed on these patients.

## POTENCY

The pharmacology of propethylene ether in many species of animals showed it to be more potent than ethyl ether and to exhibit much shorter induction period. The former was shown to obtain in man since from one-quarter to one-third the amount (measured by volume) of propethylene ether was required as would probably have been required of ethyl ether. Its potency permits a high concentration of oxygen in the respired air, and hence the avoidance of hypoxia. The induction period with a closed system in man appears to be definitely shorter than that when ethyl ether is employed.

## SUMMARY AND CONCLUSIONS

1. Isopropenyl vinyl ether, so-called propethylene ether, an isomer of cyclopropylene ether, is an anesthetic agent in man, as has been shown previously (4) in many other species of animals.

2. Human beings under propethylene ether anesthesia exhibit an anesthetic syndrome similar to that produced by ethyl ether anesthesia.

3. The authors refrain from drawing conclusions with regard to the relative advantages or disadvantages of this anesthetic agent. That propethylene ether is less volatile (boils at 19 C. higher) and is more potent than ethyl ether is observed from the data assembled. The anesthesias in man herein reported in conjunction with pharmacologic experiments indicate that propethylene ether in skilled hands is a safe anesthetic agent.

4. The authors wish to emphasize again that our knowledge of the action of this agent on man is still inadequate and our data are fragmentary. More work, which is in progress, will be necessary to establish the position merited by propethylene among the general anesthetic agents.

The authors are indebted to Miss Mary J. O'Brien of the University Hospital for conducting 8 of the recorded anesthesias.

The authors are also indebted to the Ohio Chemical and Manufacturing Company, Cleveland, for supplying us with generous samples of propethylene ether.

## REFERENCES

1. Krantz, J. C., Jr.; Carr, C. J.; Forman, S. E., and Evans, W. E., Jr.: Anesthesia. I. The Anesthetic Action of Cyclopropyl Methyl Ether, *J. Pharmacol. & Exper. Therap.* 69: 207-220 (July) 1940.
2. Krantz, J. C., Jr.; Carr, C. J.; Forman, S. E.; Evans, W. E., Jr., and Wollenweber, H. L.: Anesthesia. IV. The Anesthetic Action of Cyclopropyl Ethyl Ether, *J. Pharmacol. & Exper. Therap.* 72: 233-244 (July) 1941.
3. Krantz, J. C., Jr.; Evans, W. E., Jr.; Forman, S. E., and Wollenweber, H. L.: Anesthesia. VI. The Anesthetic Action of Cyclopropyl Vinyl Ether, *J. Pharmacol. & Exper. Therap.* 75: 30-37 (May) 1942.
4. Krantz, J. C., Jr.; Carr, C. J.; Horney, A. G., and Evans, W. E., Jr.: Anesthesia. IX. The Anesthetic Action of Isopropenyl Vinyl Ether, *J. Pharmacol. & Exper. Therap.* 79: 174-185, 1943.
5. *Handbuch der Experimentellen Pharmakologie*, Berlin, Heffter, Springer, 1923, p. 220.
